# Supplementary material for: Cobalt sulfide supported on nitrogen and sulfur dual-doped reduced graphene oxide for highly active oxygen reduction reaction
Source: Royal Society of Chemistry journal article supplement (doi:10.1039/c7ra09231h), 2017-01-01
Supplement: c7ra09231h1.pdf [file c7ra09231h1.pdf]

## Cobalt Sulfide supported on nitrogen and sulfur dual-doped reduced graphene oxide for highly active oxygen reduction reaction

Ying Zhang,<sup>a,#</sup> Pingwei Li,<sup>a,#</sup> Xuying Yin,<sup>a</sup> Ya Yan,<sup>a</sup> Ke Zhan,<sup>a</sup> Junhe Yang,<sup>a,b</sup> Bin Zhao<sup>a,b,\*</sup>

<sup>a</sup>*School of Materials Science and Engineering, University of Shanghai for Science and Technology, Shanghai 200093, China*

<sup>b</sup>*Shanghai Innovation Institute for Materials, Shanghai 200444, China.*

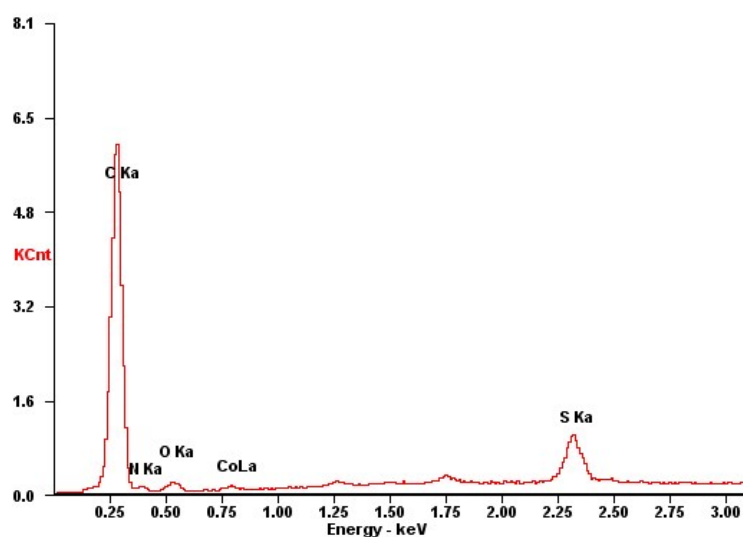

**Figure S1** Typical EDS spectrum of the Co-S/NS-rGO composite

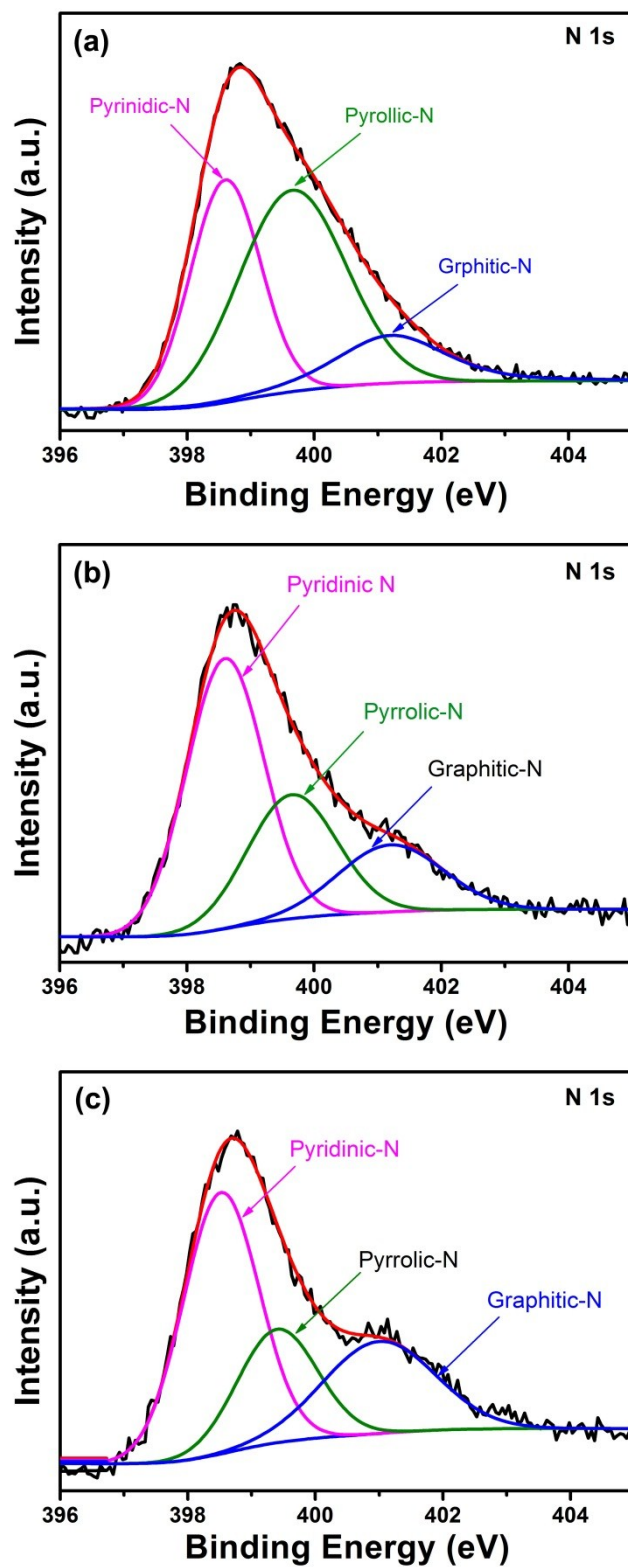

**Figure S2** High-resolution XPS N1S spectra: (a) Co-S/NS-rGO-400; (b) Co-S/NS-rGO-500; (c) Co-S/NS-rGO-600

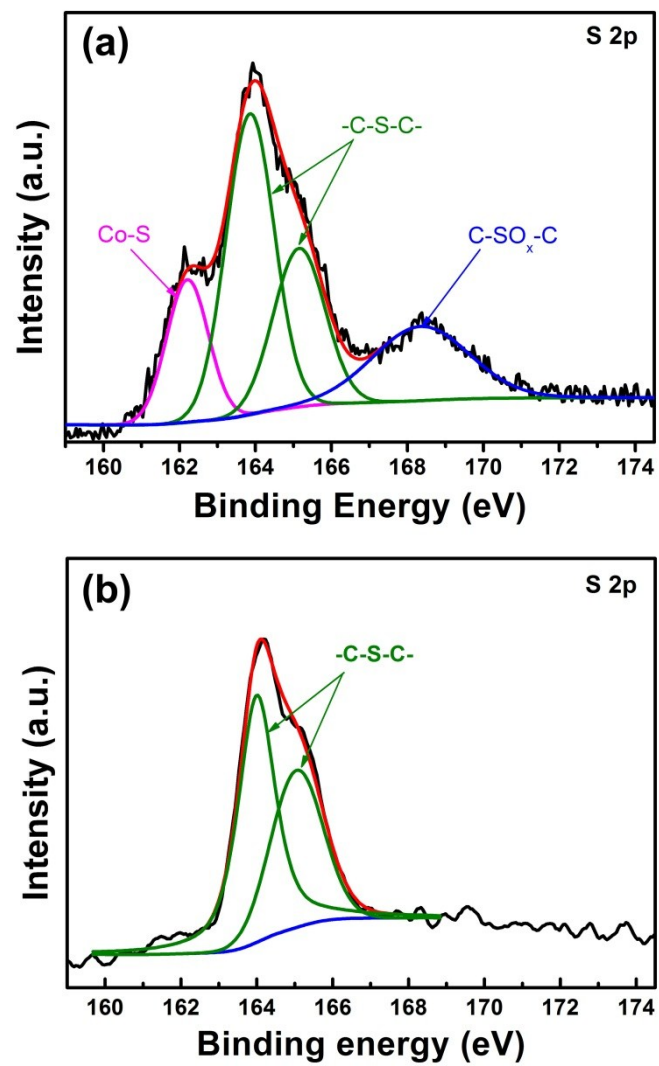

**Figure S3** High-resolution XPS S2p spectra of Co-S/NS-rGO-500 (a) and NS-rGO (b)

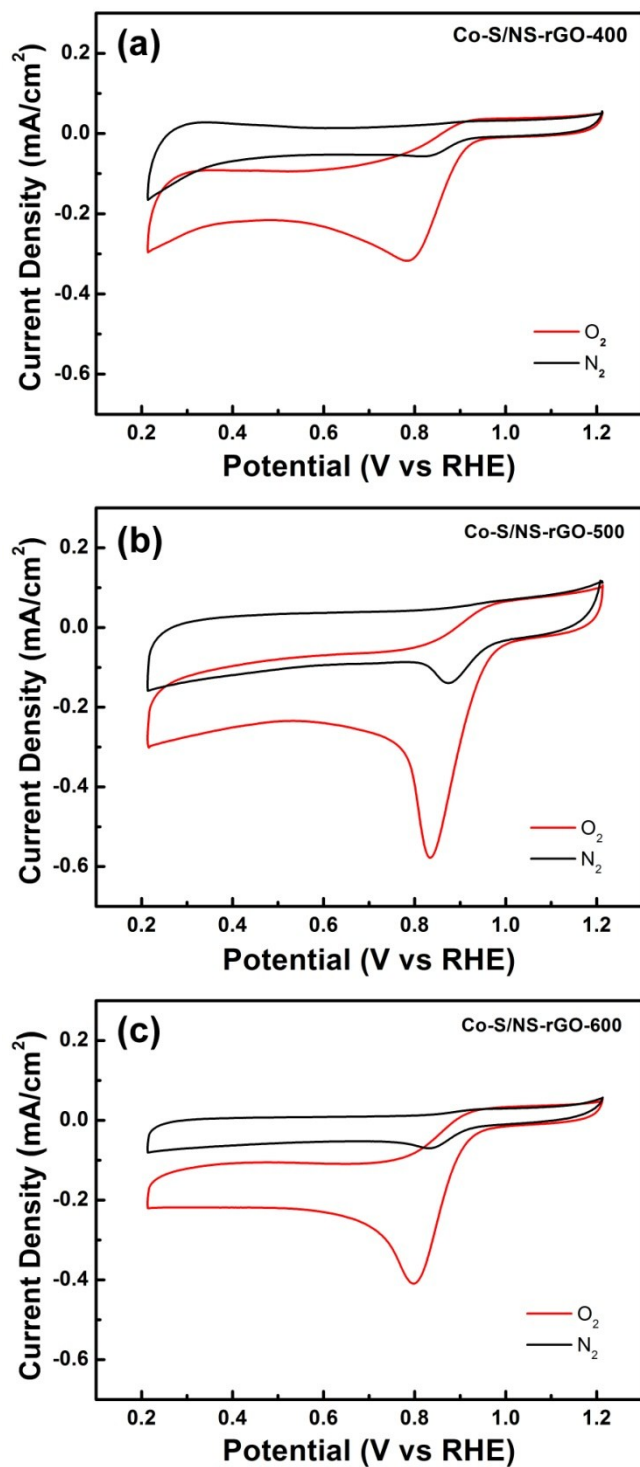

**Figure S4** CV curves of the composite catalysts in  $N_2$ - and  $O_2$ -saturated 0.1 M KOH solution: (a) Co-S/NS-rGO-400; (b) Co-S/NS-rGO-500; (c) Co-S/NS-rGO-600
